# Supplementary material for: Customized A–D–A type molecule to construct a nitric oxide nanogenerator with enhanced antibacterial activity for infected wound healing
Source: Royal Society of Chemistry journal article supplement (doi:10.1039/d4tb01201a), 2024-01-01
Supplement: d4tb01201a1.pdf [file d4tb01201a1.pdf]

## Supporting Information

# Customized A-D-A type molecule to construct nitric oxide nanogenerator with enhanced antibacterial activity for infected wound healing

*Yunxia Wang,<sup>a</sup> Xiaohuan Wang,<sup>a</sup> Chuangxin Zhang,<sup>a</sup> Ruipeng Li,<sup>a</sup> Jing Li,<sup>a</sup> Hu Shi,<sup>a</sup> Caihong Zhang,<sup>\*a</sup> and Liheng Feng<sup>\*a,b</sup>*

<sup>a</sup>School of Chemistry and Chemical Engineering, Shanxi University, Taiyuan, 030006, P.R. China

<sup>b</sup>Institute for Carbon-Based Thin Film Electronics, Peking University, Shanxi (ICTFE-PKU), Taiyuan 030012, P.R. China.

E-mail: chzhang@sxu.edu.cn; lh Feng@sxu.edu.cn.

## 1. Experimental Sections

**Materials and measurements.** 2,7-dibromofluorene, 1,6-dibromohexane, Tetrabutylammonium bromide (TBAB), 5-bromo-2-(3,4-vinyldioxythiophene) formaldehyde, potassium acetate, 1,3-Bis(dicyanomethylene)indan, 1,3-Indanedione, 3-Dicycanovinylindan-1-one, bis(pinacolato)diboron,  $K_2CO_3$ , tetratriphenylphosphine palladium and  $PdCl_2(dppf)$  were obtained from Anhui Zesheng Technology Co., Ltd. BNN6 and Human Serum Albumin (HSA) were obtained from Shanghai yuanye Bio-Technology Co., Ltd. 2,7-Dichloro-Dihydrofluoresceindiacetate (DCFH-DA), Dihydroethidium (DHE), Hydrogen Peroxide Assay Kit, Aminophenyl fluorescein (APF), 1,3-Diphenylisobenzofuran (DPBF) were obtained from Shanghai Maokang Biotechnology Co., Ltd. LB nutrient agar, nutrient agar (NA) and trypticase soy broth (TSB) were obtained from Qingdao Hope Bio-Technology Co., Ltd. *S. aureus* (ATCC 6538) was obtained from China National Center for Microbial Culture Preservation and Management. NMR and MS spectra were obtained on Bruker AVANCE III HD series spectrometer and ultrafleXtreme MALDI-TOF/TOF (Germany). UV-Vis absorption spectra and fluorescence emission spectra were measured using Hitachi UH5300 and F-4600 spectrophotometers (Japan). Hydrated particle size distribution and zeta potentials were recorded by a Winner 802 analyzer (China) and Malvern Nano ZS90 (America). TEM images of the material were obtained using a JEOL JEM-F200. Fluorescence

images of microbes were obtained on a Zeiss LSM 880 confocal laser scanning microscope (Germany).

**Calculation of photothermal conversion efficiency.** The photothermal conversion efficiency ( $\eta$ ) of materials was according to the formula as follows:

$$\eta = \frac{hS(\Delta T_{max} - Q_{Dis})}{I(1 - 10^{-A_{660}})} \quad (1)$$

$$hS = \frac{m_D C_D}{\tau_s} \quad (2)$$

$$\tau_s = -\frac{t}{\ln\theta} \quad (3)$$

$$\theta = \frac{T - T_{surr}}{T_{max} - T_{surr}} \quad (4)$$

In the equation (1),  $h$  is the heat transfer coefficient;  $S$  is the heated surface area;  $\Delta T_{max}$  represents the maximum temperature difference and is calculated from  $T_{max} - T_{surr}$  ( $T_{max}$  and  $T_{surr}$  represent the maximum temperature and ambient temperature, respectively);  $I$  represents laser power and  $A_{660}$  is the absorbance intensity of sample at 660 nm. In the equation (2),  $m_D$  and  $C_D$  represent the mass and heat capacity of water, respectively.

## 2. Supporting Figures

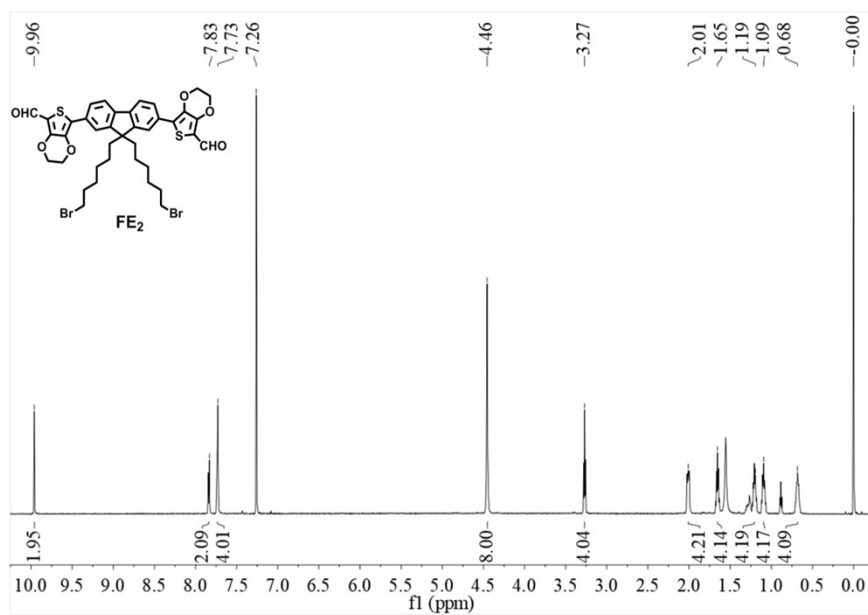

**Figure S1.**  $^1\text{H}$  NMR spectrum of  $\text{FE}_2$  in  $\text{CDCl}_3$ .

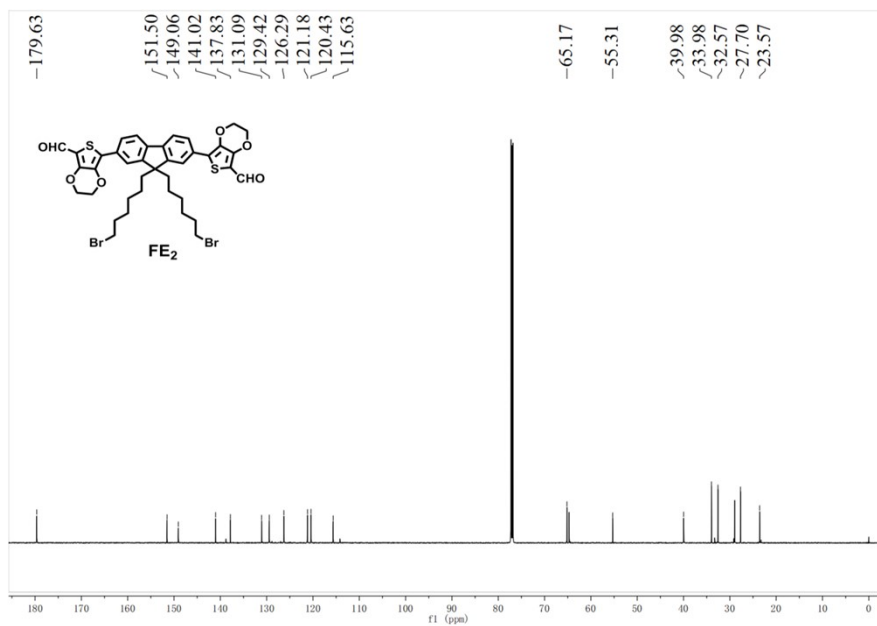

**Figure S2.**  $^{13}\text{C}$  NMR spectrum of  $\text{FE}_2$  in  $\text{CDCl}_3$ .

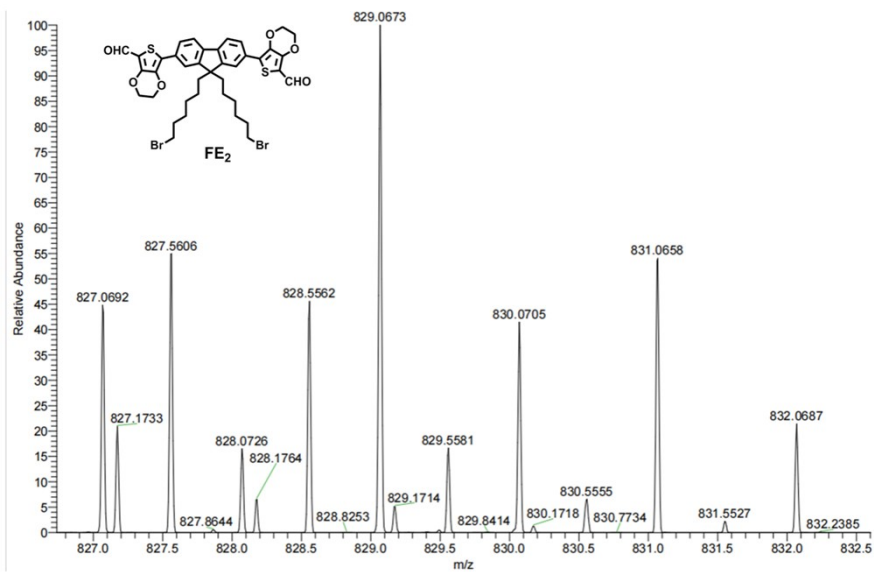

**Figure S3.** HRMS-ESI spectrum of  $FE_2$ .

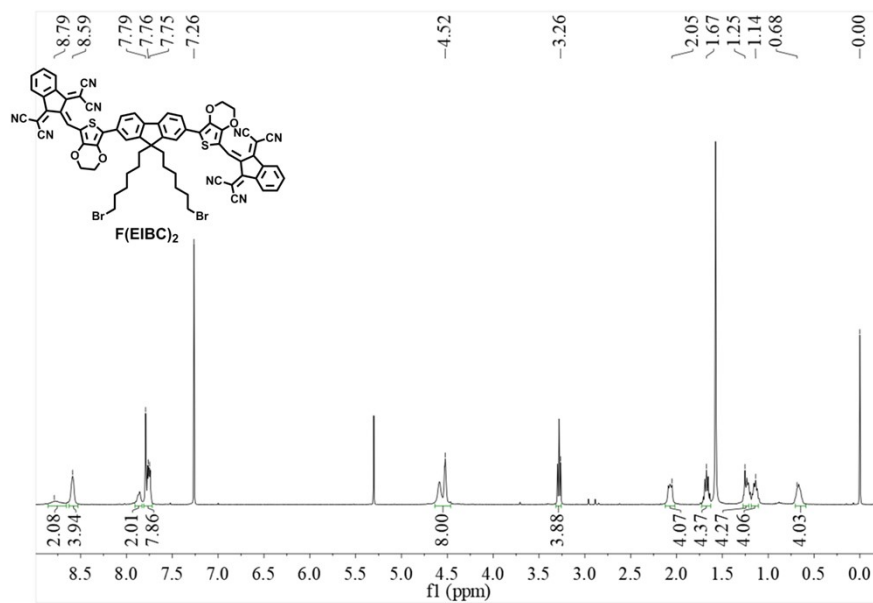

**Figure S4.**  $^1H$  NMR spectrum of  $F(EIBC)_2$  in  $CDCl_3$ .

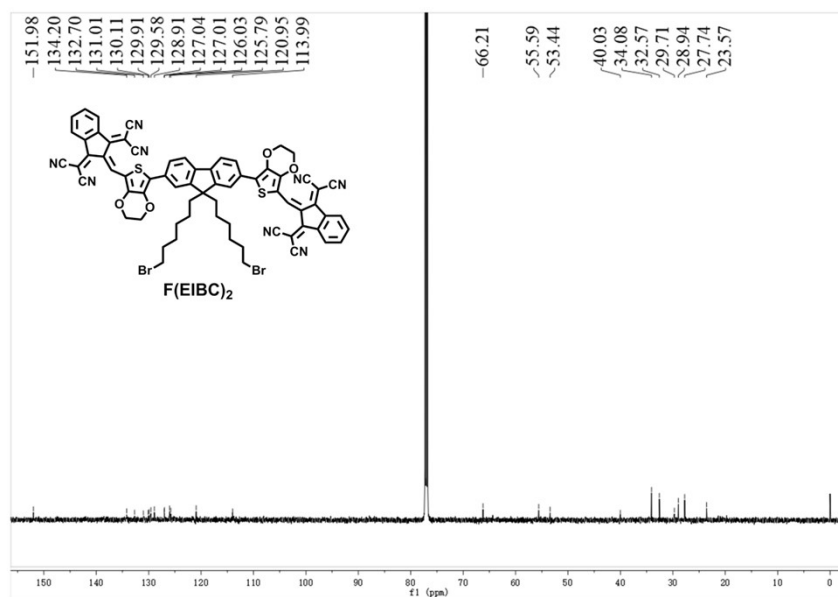

**Figure S5.**  $^{13}C$  NMR spectrum of  $F(EIBC)_2$  in  $CDCl_3$ .

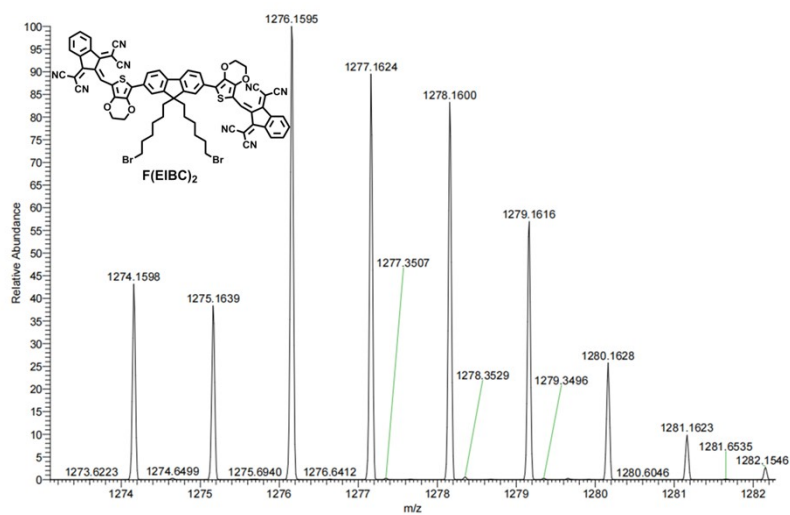

**Figure S6.** HRMS-ESI spectrum of  $F(EIBC)_2$ .

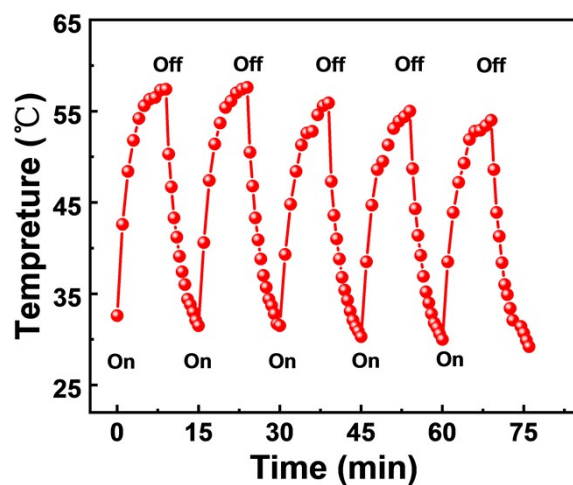

**Fig. S7.** The photothermal stability measurement of F(EIBC)<sub>2</sub> using a 660 nm laser (1 W/cm<sup>2</sup>).

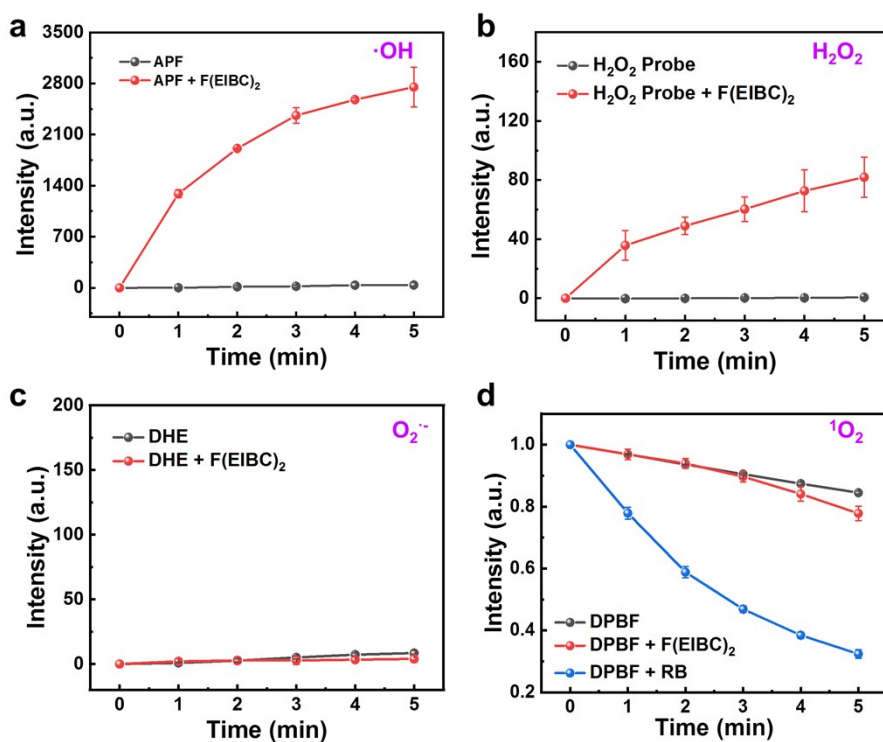

**Fig. S8** The measurement of generation of a)  $\cdot\text{OH}$ , b)  $\text{H}_2\text{O}_2$ , c)  $\cdot\text{O}_2^-$  and d)  $^1\text{O}_2$  from irradiated F(EIBC)<sub>2</sub> using a 660 nm laser (1 W/cm<sup>2</sup>).

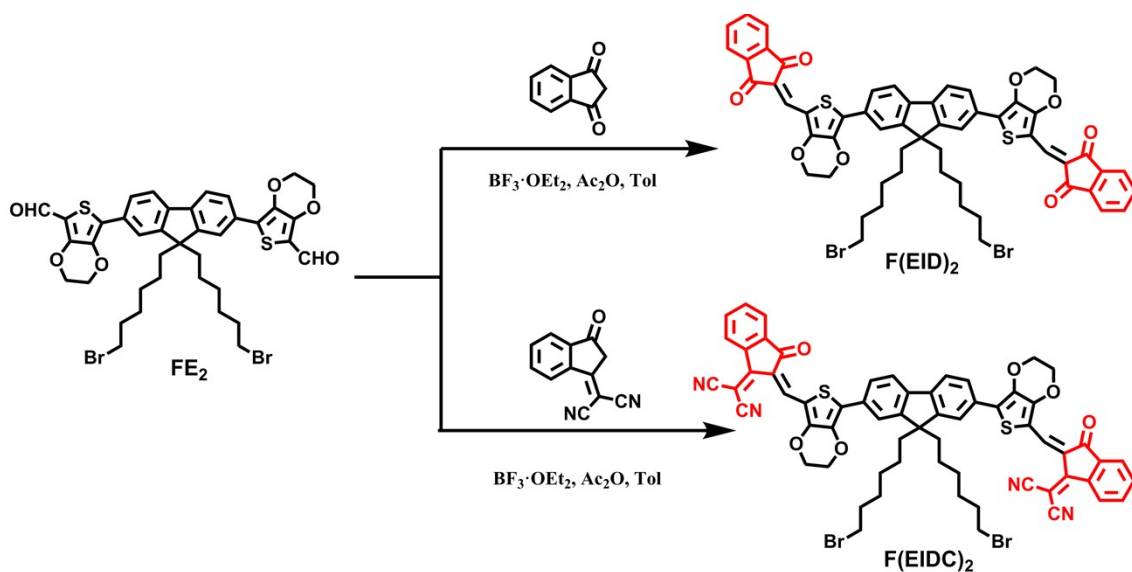

**Fig. S9** Synthetic route of  $F(EID)_2$  and  $F(EIDC)_2$ .

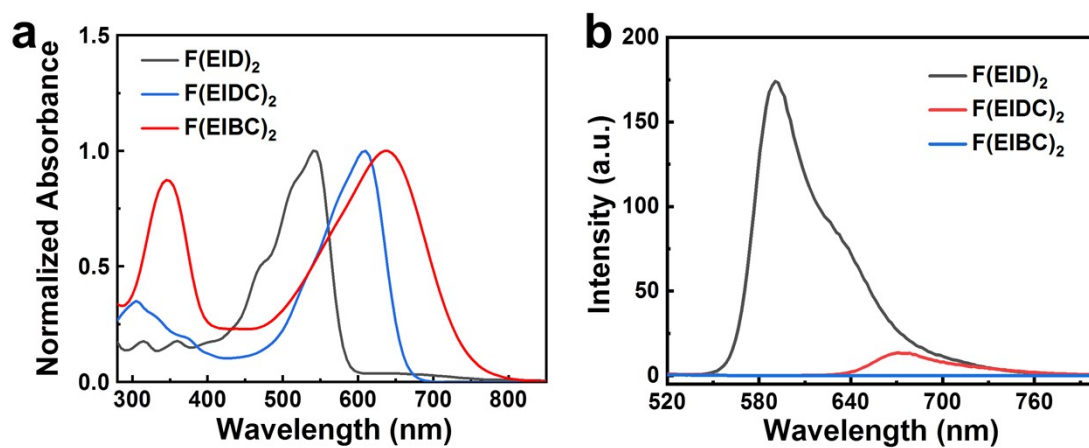

**Fig. S10** a) Normalized absorption spectra of three molecules. b) Fluorescent spectra of three molecules.



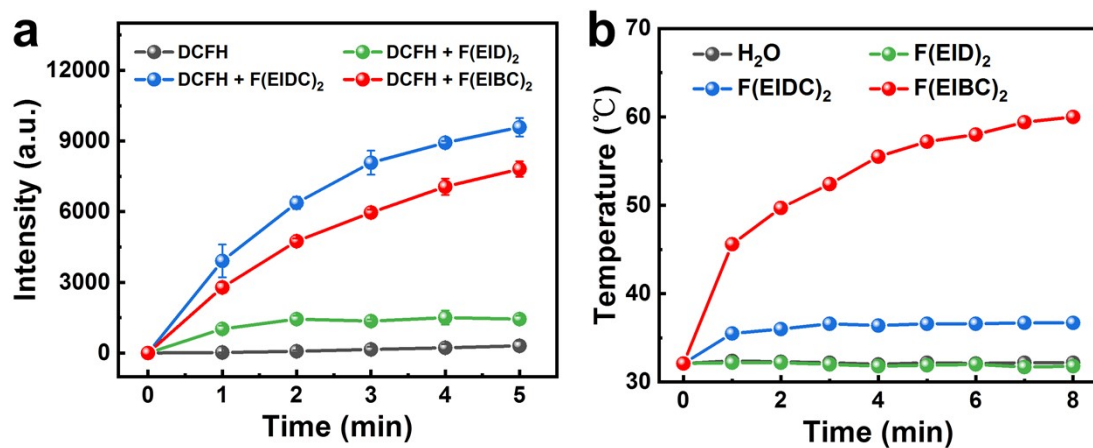

**Fig. S11** a) ROS generation detection of three molecules. b) Photothermal property test of three molecules.

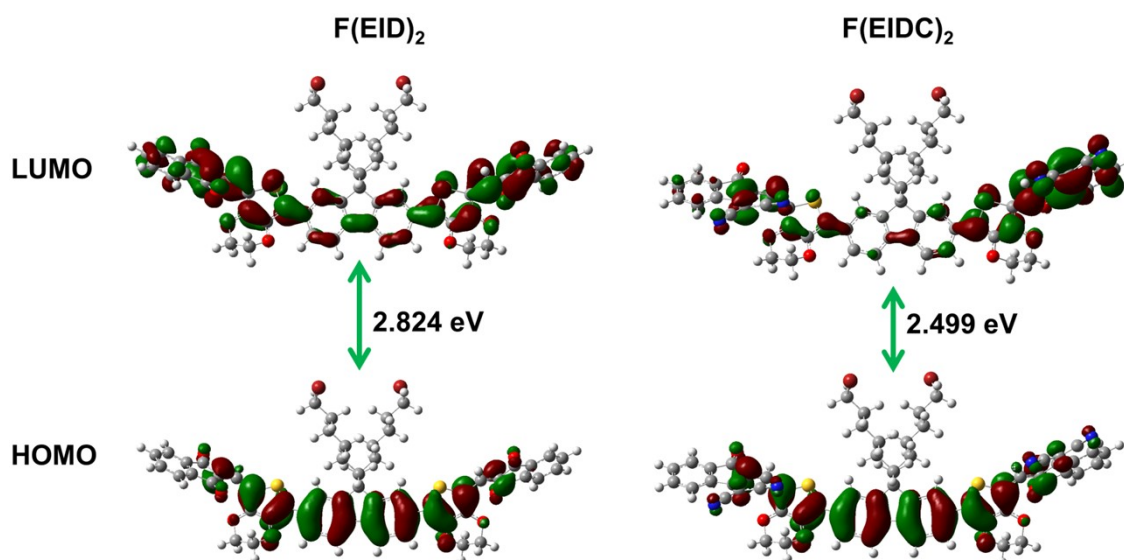

**Fig. S12** The HOMO-LUMO distributions and optimized geometries of F(EID)<sub>2</sub> and F(EIDC)<sub>2</sub>.

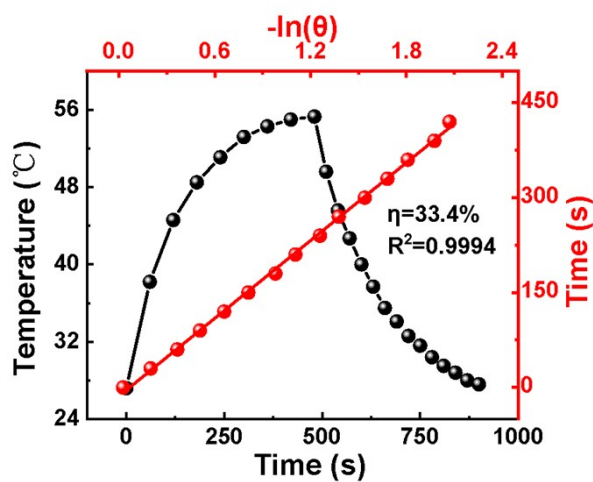

**Fig. S13** Photothermal response of HFB solution (10  $\mu\text{M}$ ) under light irradiation of a 660 nm laser (1  $\text{W}/\text{cm}^2$ ) for 8 min followed by removing the laser.

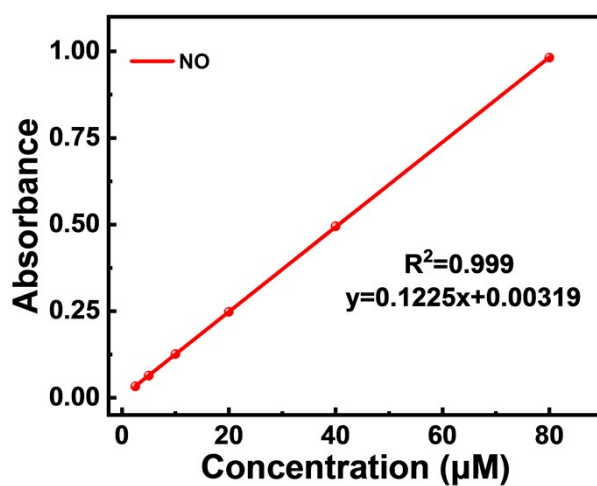

**Fig. S14** The NO standard curve established by  $\text{NaNO}_2$  aqueous solution.

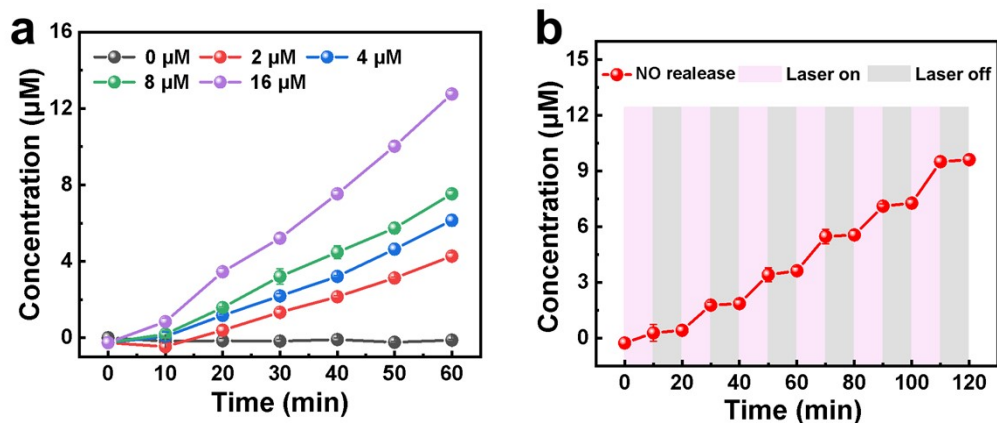

**Fig. S15** The measurement of NO generation a) at different concentrations of HFB under light irradiation and b) during 6 light on-off cycles. Light: 660 nm laser; 1 W/cm<sup>2</sup>.

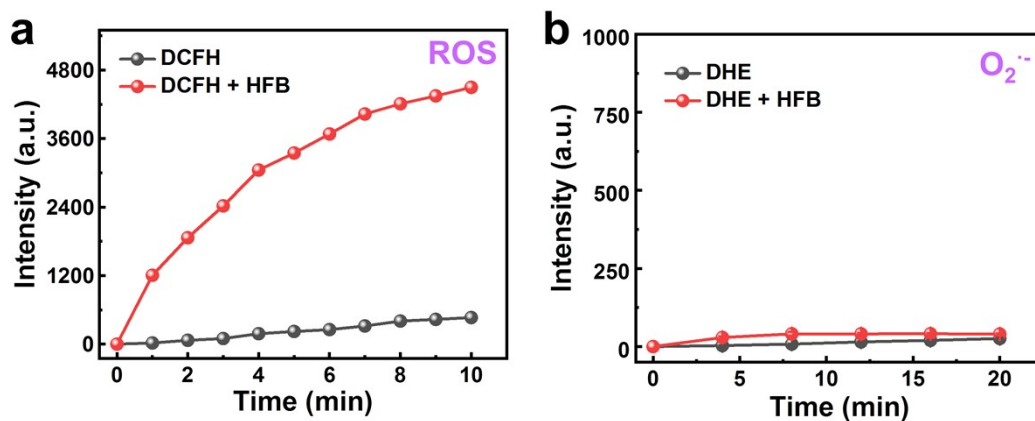

**Fig. S16** The measurement of a) total ROS and b)  $\cdot\text{O}_2^-$  generated by HFB under a 660 nm laser irradiation (1 W/cm<sup>2</sup>).

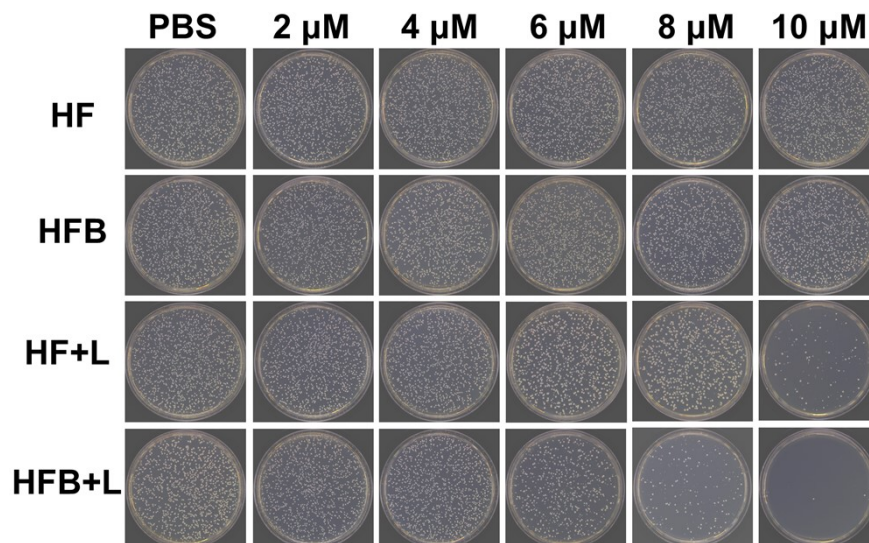

**Fig. S17** The representative photographs of *S. aureus* colonies grew on agar plates after different treatments.

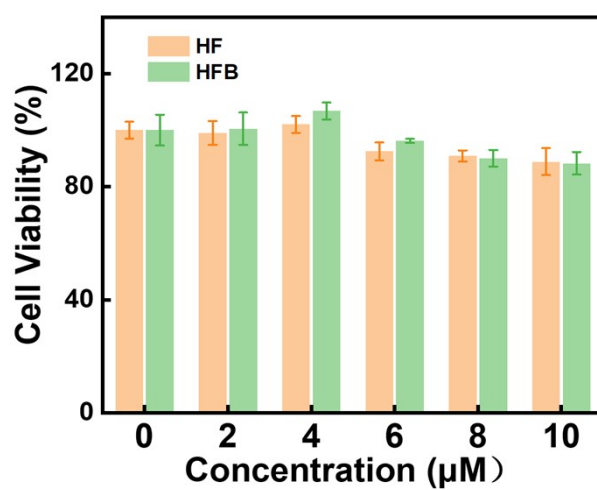

**Fig. S18** Cell viability of L929 cells after different treatments.

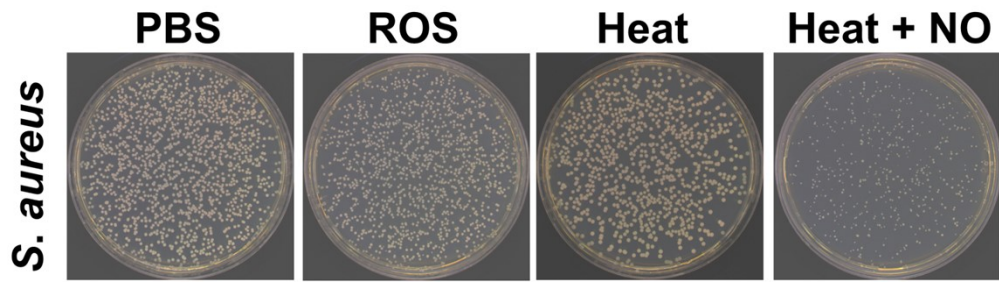

**Fig. S19** The representative photographs of *S. aureus* colonies grew on agar plates after different type of damages.

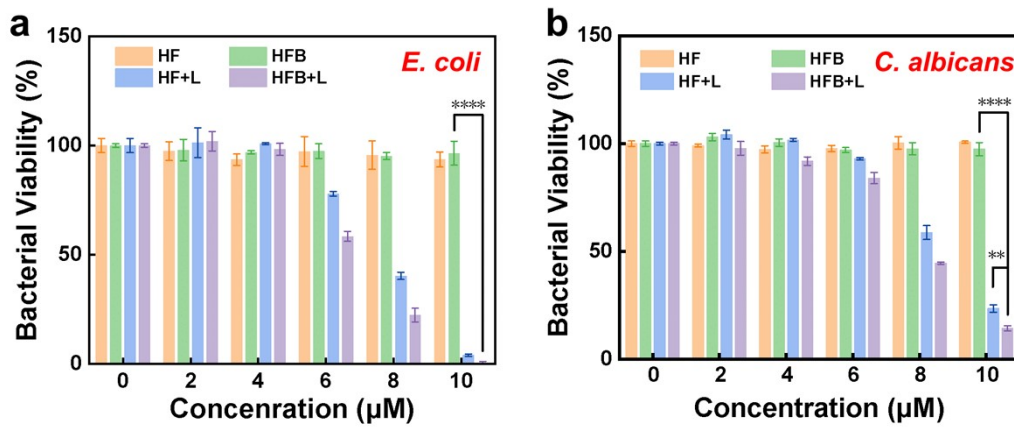

**Fig. S20** In vitro antimicrobial activity of HFB toward a) *E. coli* and b) *C. albicans*.

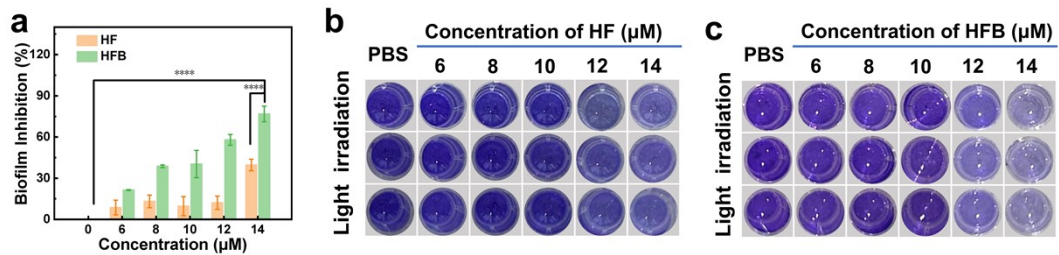

**Fig. S21** a) The measurement of *S. aureus* biofilm inhibition of different concentrations of HF and HFB under laser irradiation (1 W/cm<sup>2</sup>). The representative photos of biofilms stained by crystal violet after treatment of irradiated b) HF and c) HFB.

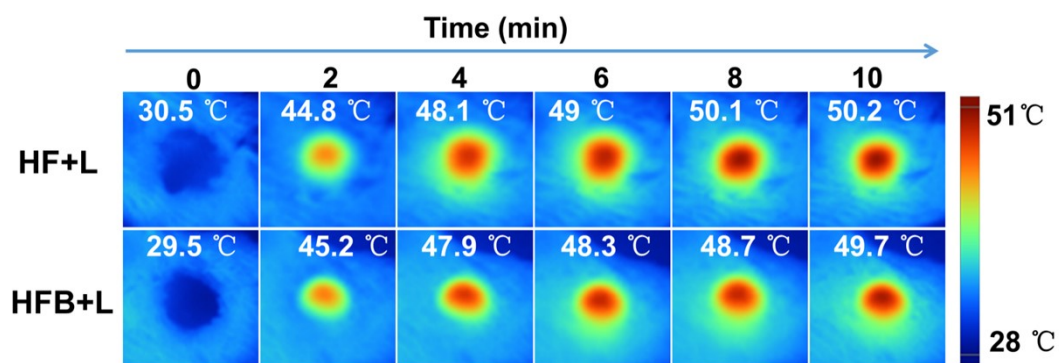

**Fig. S22** The photothermal images of infected wound of mice under different treatments at different time points.

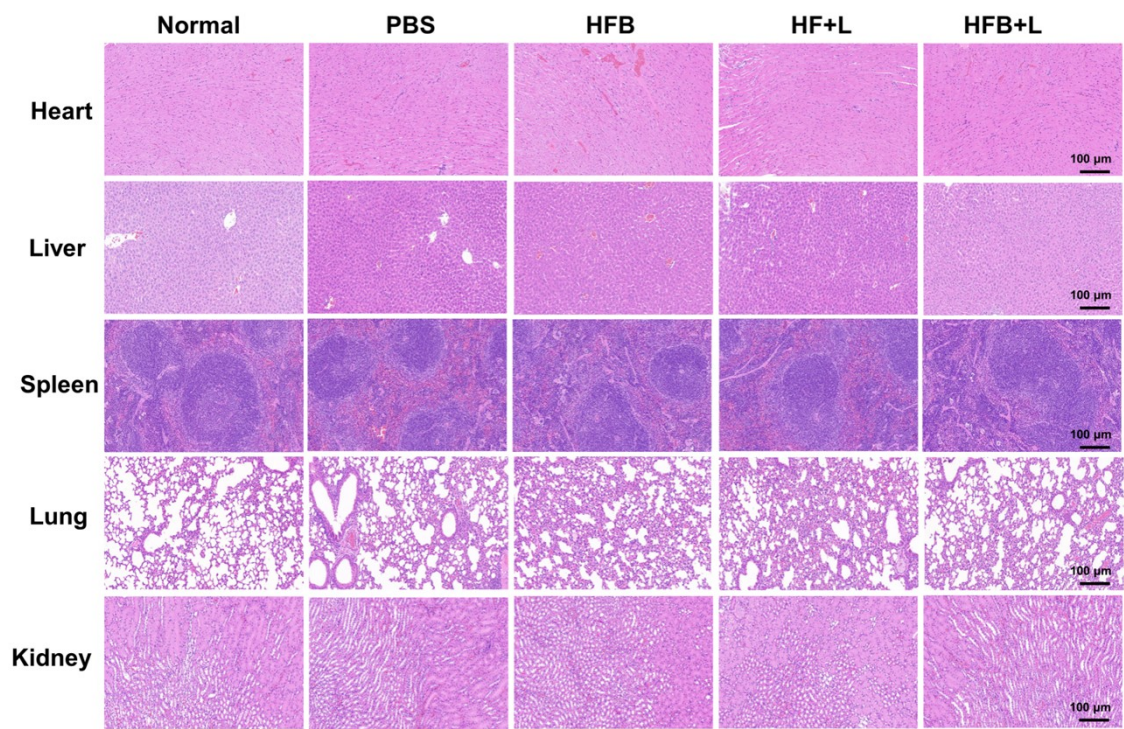

**Fig. S23** The H&E staining of major organs of mice after different treatments.
